# Supplementary material
Source: MDPI journal article supplement (https://www.mdpi.com/2673-4532/5/2/10)
Supplement: s1 [file s1]

Supplementary Materials For:

## Headspace-SIFT-MS Workflows for Rapid Screening and Quantitation of Hazardous Volatile Impurities in Personal Care Products

**Mark J. Perkins<sup>1</sup>, Colin J. Hastie<sup>1</sup>, and Vaughan S. Langford<sup>2,\*</sup>**

1. Element Lab Solutions, Cambridge CB3 0NA, United Kingdom

2. Syft Technologies Limited, Christchurch 8011, New Zealand

### Table of Contents

|                                                                                                                                                                   |        |
|-------------------------------------------------------------------------------------------------------------------------------------------------------------------|--------|
| <b>Table S1.</b> Benzene concentrations ( $\text{ng g}^{-1}$ ) in nine haircare and skincare products using the method of standard additions with SIFT-MS.        | Page 2 |
| <b>Table S2.</b> 1,4-Dioxane concentrations ( $\mu\text{g g}^{-1}$ ) in nine haircare and skincare products using the method of standard additions with SIFT-MS.  | Page 5 |
| <b>Table S3.</b> Formaldehyde concentrations ( $\mu\text{g g}^{-1}$ ) in nine haircare and skincare products using the method of standard additions with SIFT-MS. | Page 8 |

**Table S1.** Benzene concentrations ( $\text{ng g}^{-1}$ ) in nine haircare and skincare products using the method of standard additions with SIFT-MS. Values reported in the main article are calculated from the ‘good’ amounts shown in green. Values in gray are subject to significant interference for the product.

| Product Number<br>or Calibration | Standard Conc.<br>(ppb) or<br>Parameter | Benzene Product Ions      |                  |                   |                   |
|----------------------------------|-----------------------------------------|---------------------------|------------------|-------------------|-------------------|
|                                  |                                         | $\text{H}_3\text{O}^+ 79$ | $\text{NO}^+ 78$ | $\text{NO}^+ 108$ | $\text{O}_2^+ 78$ |
| <b>1</b>                         | 0                                       | 11.5                      | 1.36             | 28.6              | 2.15              |
|                                  | 20                                      | 53.9                      | 45.9             | 70.1              | 46.6              |
|                                  | 40                                      | 119                       | 108              | 121               | 109               |
|                                  | 60                                      | 163                       | 151              | 168               | 151               |
|                                  | Slope                                   | 2.598                     | 2.555            | 2.346             | 2.545             |
|                                  | Intercept                               | 8.91                      | -0.088           | 26.56             | 0.845             |
|                                  | $R^2$                                   | 0.9929                    | 0.9948           | 0.9985            | 0.9942            |
|                                  | LOQ                                     | 1.62                      | 1.01             | 1.78              | 1.72              |
|                                  | Amount (ng/g)                           | <LOQ                      | <LOQ             | 4.93              | <LOQ              |
|                                  |                                         |                           |                  |                   |                   |
| <b>2</b>                         | 0                                       | 24.4                      | 21.2             | 45.3              | 22                |
|                                  | 20                                      | 60.4                      | 52               | 72.4              | 55.9              |
|                                  | 40                                      | 102                       | 92.9             | 112               | 99.6              |
|                                  | 60                                      | 141                       | 135              | 146               | 134               |
|                                  | Slope                                   | 1.957                     | 1.912            | 1.709             | 1.899             |
|                                  | Intercept                               | 23.24                     | 17.93            | 42.67             | 20.92             |
|                                  | $R^2$                                   | 0.9993                    | 0.9951           | 0.9952            | 0.9975            |
|                                  | LOQ                                     | 2.15                      | 1.34             | 2.44              | 2.30              |
|                                  | Amount (ng/g)                           | 5.17                      | 4.08             | 10.9              | 4.79              |
|                                  |                                         |                           |                  |                   |                   |
| <b>3</b>                         | 0                                       | 9.8                       | 5.75             | 233               | 12.6              |
|                                  | 20                                      | 29.8                      | 22.6             | 249               | 29.7              |
|                                  | 40                                      | 53.2                      | 49.4             | 268               | 55.6              |
|                                  | 60                                      | 72.5                      | 67.5             | 287               | 71.4              |
|                                  | Slope                                   | 1.058                     | 1.060            | 0.905             | 1.012             |
|                                  | Intercept                               | 9.6                       | 4.505            | 232.1             | 11.98             |
|                                  | $R^2$                                   | 0.9987                    | 0.9922           | 0.9984            | 0.9911            |
|                                  | LOQ                                     | 3.98                      | 2.42             | 4.61              | 4.33              |
|                                  | Amount (ng/g)                           | <LOQ                      | <LOQ             | 111.6             | 5.15              |
|                                  |                                         |                           |                  |                   |                   |
| <b>4</b>                         | 0                                       | 2520                      | 2320             | 3040              | 2420              |
|                                  | 1000                                    | 3590                      | 3330             | 3880              | 3360              |
|                                  | 2000                                    | 4440                      | 4080             | 4700              | 4190              |
|                                  | 3000                                    | 5680                      | 5300             | 5840              | 5380              |
|                                  | Slope                                   | 1.033                     | 0.969            | 0.922             | 0.971             |
|                                  | Intercept                               | 2508                      | 2304             | 2982              | 2381              |
|                                  | $R^2$                                   | 0.9952                    | 0.9920           | 0.9934            | 0.9944            |
|                                  | LOQ                                     | 4.07                      | 2.65             | 4.52              | 4.51              |
|                                  | Amount (ng/g)                           | 1056                      | 1034             | 1407              | 1067              |
|                                  |                                         |                           |                  |                   |                   |
| <b>5</b>                         | 0                                       | 5.36                      | 2.84             | 136               | 7.09              |
|                                  | 20                                      | 40.4                      | 37.3             | 165               | 38.8              |
|                                  | 40                                      | 89.7                      | 83.1             | 204               | 84.4              |
|                                  | 60                                      | 123                       | 114              | 232               | 117               |
|                                  |                                         |                           |                  |                   |                   |

| Product Number<br>or Calibration | Standard Conc.<br>(ppb) or<br>Parameter | Benzene Product Ions             |                    |                     |                                |
|----------------------------------|-----------------------------------------|----------------------------------|--------------------|---------------------|--------------------------------|
|                                  |                                         | H <sub>3</sub> O <sup>+</sup> 79 | NO <sup>+</sup> 78 | NO <sup>+</sup> 108 | O <sub>2</sub> <sup>+</sup> 78 |
| 6                                | Slope                                   | 2.011                            | 1.896              | 1.635               | 1.877                          |
|                                  | Intercept                               | 4.282                            | 2.418              | 135.2               | 5.523                          |
|                                  | R <sup>2</sup>                          | 0.9943                           | 0.9948             | 0.9958              | 0.9949                         |
|                                  | LOQ                                     | 2.09                             | 1.36               | 2.55                | 2.33                           |
|                                  | Amount (ng/g)                           | <LOQ                             | <LOQ               | 36.0                | <LOQ                           |
|                                  | 0                                       | 7.38                             | 3.12               | 37.4                | 3.71                           |
|                                  | 20                                      | 41.7                             | 34.9               | 66.6                | 35.6                           |
|                                  | 40                                      | 85.9                             | 77.4               | 104                 | 74.9                           |
|                                  | 60                                      | 114                              | 102                | 131                 | 109                            |
|                                  | Slope                                   | 1.820                            | 1.696              | 1.591               | 1.776                          |
| 7                                | Intercept                               | 7.636                            | 3.484              | 37.02               | 2.527                          |
|                                  | R <sup>2</sup>                          | 0.9935                           | 0.9907             | 0.9964              | 0.9985                         |
|                                  | LOQ                                     | 2.31                             | 1.52               | 2.62                | 2.46                           |
|                                  | Amount (ng/g)                           | <LOQ                             | <LOQ               | 10.1                | <LOQ                           |
|                                  | 0                                       | 42.5                             | 4.38               | 1400                | 7.27                           |
|                                  | 20                                      | 81.7                             | 36.2               | 1450                | 39.5                           |
|                                  | 40                                      | 139                              | 80.6               | 1490                | 84.4                           |
|                                  | 60                                      | 179                              | 122                | 1530                | 121                            |
|                                  | Slope                                   | 2.334                            | 1.986              | 2.150               | 1.930                          |
|                                  | Intercept                               | 40.53                            | 1.206              | 1403                | 5.129                          |
| 8                                | R <sup>2</sup>                          | 0.9943                           | 0.9956             | 0.9968              | 0.9964                         |
|                                  | LOQ                                     | 1.80                             | 1.29               | 1.94                | 2.27                           |
|                                  | Amount (ng/g)                           | 7.55                             | <LOQ               | 283.9               | <LOQ                           |
|                                  | 0                                       | 29.5                             | 6.44               | 539                 | 75.3                           |
|                                  | 20                                      | 47.6                             | 30.5               | 489                 | 94.9                           |
|                                  | 40                                      | 74.1                             | 49.4               | 527                 | 117                            |
|                                  | 60                                      | 95.8                             | 68.4               | 545                 | 131                            |
|                                  | Slope                                   | 1.127                            | 1.024              | 0.28                | 0.946                          |
|                                  | Intercept                               | 27.94                            | 7.968              | 516.6               | 76.17                          |
|                                  | R <sup>2</sup>                          | 0.9953                           | 0.9963             | 0.0827              | 0.9925                         |
| 9                                | LOQ                                     | 3.73                             | 2.51               | 14.89               | 4.62                           |
|                                  | Amount (ng/g)                           | 10.8                             | 3.39               | 802.6               | 35.0                           |
|                                  | 0                                       | 35.4                             | 2.89               | 380                 | 6.56                           |
|                                  | 20                                      | 62.9                             | 33.8               | 409                 | 36.2                           |
|                                  | 40                                      | 93.6                             | 66.8               | 439                 | 69.3                           |
|                                  | 60                                      | 125                              | 91.5               | 465                 | 97.9                           |
|                                  | Slope                                   | 1.498                            | 1.494              | 1.425               | 1.536                          |
|                                  | Intercept                               | 34.3                             | 3.923              | 380.5               | 6.422                          |
|                                  | R <sup>2</sup>                          | 0.9991                           | 0.9966             | 0.9991              | 0.9993                         |
|                                  | LOQ                                     | 2.81                             | 1.72               | 2.93                | 2.85                           |
| Aqueous Cal.                     | Amount (ng/g)                           | 9.96                             | <LOQ               | 116.2               | <LOQ                           |
|                                  | 0                                       | 3.01                             | 0.249              | 33.2                | 1.11                           |
|                                  | 20                                      | 62.5                             | 60.8               | 63.1                | 60.4                           |

| Product Number<br>or Calibration      | Standard Conc.<br>(ppb) or<br>Parameter | Benzene Product Ions             |                    |                     |                                |
|---------------------------------------|-----------------------------------------|----------------------------------|--------------------|---------------------|--------------------------------|
|                                       |                                         | H <sub>3</sub> O <sup>+</sup> 79 | NO <sup>+</sup> 78 | NO <sup>+</sup> 108 | O <sub>2</sub> <sup>+</sup> 78 |
|                                       | 40                                      | 125                              | 118                | 119                 | 116                            |
|                                       | 60                                      | 182                              | 179                | 174                 | 177                            |
|                                       | 80                                      | 238                              | 236                | 233                 | 233                            |
|                                       | 100                                     | 305                              | 290                | 271                 | 285                            |
|                                       | Slope                                   | 2.991                            | 2.908              | 2.505               | 2.855                          |
|                                       | Intercept                               | 3.053                            | 1.959              | 23.619              | 2.686                          |
|                                       | R <sup>2</sup>                          | 0.9995                           | 0.9997             | 0.9928              | 0.9995                         |
| <b>Aqueous Cal.:<br/>High Benzene</b> | <b>0</b>                                | 19.1                             | 0.661              | 13.7                | 0.824                          |
|                                       | 1000                                    | 3080                             | 3020               | 2950                | 3030                           |
|                                       | 2000                                    | 6090                             | 6000               | 5720                | 5950                           |
|                                       | 3000                                    | 9540                             | 9300               | 8800                | 9330                           |
|                                       | 4000                                    | 12500                            | 12200              | 11900               | 12400                          |
|                                       | 5000                                    | 15200                            | 14700              | 14300               | 14900                          |
|                                       | Slope                                   | 3.065                            | 2.956              | 2.888               | 3.019                          |
|                                       | Intercept                               | 87                               | 176                | 70                  | 65                             |
|                                       | R <sup>2</sup>                          | 0.9983                           | 0.9978             | 0.9983              | 0.9978                         |

**Table S2.** 1,4-Dioxane concentrations ( $\mu\text{g g}^{-1}$ ) in nine haircare and skincare products using the method of standard additions with SIFT-MS. Values reported in the main article are calculated from the 'good' amounts shown in green. Values in gray are subject to significant interference for the product.

| Product Number or Calibration | Standard Conc. (ppm) or Parameter | 1,4- Dioxane Product Ions |                  |                  |                   |                   |
|-------------------------------|-----------------------------------|---------------------------|------------------|------------------|-------------------|-------------------|
|                               |                                   | $\text{H}_3\text{O}^+ 89$ | $\text{NO}^+ 87$ | $\text{NO}^+ 88$ | $\text{O}_2^+ 58$ | $\text{O}_2^+ 88$ |
| <b>1</b>                      | 0                                 | 46                        | 26.2             | 3230             | 8700              | 61                |
|                               | 2                                 | 100                       | 82.9             | 3050             | 8260              | 123               |
|                               | 4                                 | 157                       | 144              | 3140             | 8160              | 180               |
|                               | 6                                 | 215                       | 208              | 3040             | 8030              | 249               |
|                               | Slope                             | 28.2                      | 30.325           | -24              | -105.5            | 31.05             |
|                               | Intercept                         | 44.9                      | 24.3             | 3187             | 8604              | 60.1              |
|                               | R <sup>2</sup>                    | 0.9997                    | 0.9993           | 0.4861           | 0.8782            | 0.9986            |
|                               | LOQ                               | 0.31                      | 0.37             | 0.49             | 0.42              | 0.37              |
|                               | Amount ( $\mu\text{g/g}$ )        | 0.796                     | 0.401            | -66.4            | -40.8             | 0.968             |
| <b>2</b>                      | 0                                 | 175                       | 36.9             | 73.1             | 299               | 84.1              |
|                               | 2                                 | 229                       | 102              | 136              | 344               | 146               |
|                               | 4                                 | 296                       | 160              | 196              | 396               | 206               |
|                               | 6                                 | 342                       | 216              | 244              | 439               | 265               |
|                               | Slope                             | 28.4                      | 29.765           | 28.635           | 23.6              | 30.135            |
|                               | Intercept                         | 175.3                     | 39.43            | 76.37            | 298.7             | 84.87             |
|                               | R <sup>2</sup>                    | 0.9954                    | 0.9988           | 0.9964           | 0.9988            | 0.9999            |
|                               | LOQ                               | 0.31                      | 0.38             | 0.41             | 1.88              | 0.38              |
|                               | Amount ( $\mu\text{g/g}$ )        | 3.09                      | 0.662            | 1.33             | 6.33              | 1.41              |
| <b>3</b>                      | 0                                 | 169                       | 90.2             | 165              | 349               | 145               |
|                               | 2                                 | 234                       | 160              | 231              | 407               | 204               |
|                               | 4                                 | 279                       | 208              | 280              | 443               | 266               |
|                               | 6                                 | 350                       | 267              | 345              | 504               | 320               |
|                               | Slope                             | 29.4                      | 28.92            | 29.45            | 25.05             | 29.35             |
|                               | Intercept                         | 169.8                     | 94.54            | 166.9            | 350.6             | 145.7             |
|                               | R <sup>2</sup>                    | 0.9934                    | 0.9951           | 0.9969           | 0.9911            | 0.9993            |
|                               | LOQ                               | 0.30                      | 0.39             | 0.40             | 1.77              | 0.39              |
|                               | Amount ( $\mu\text{g/g}$ )        | 2.89                      | 1.63             | 2.83             | 7.00              | 2.48              |
| <b>4</b>                      | 0                                 | 923                       | 69.1             | 880              | 2410              | 1040              |
|                               | 2                                 | 954                       | 123              | 946              | 2480              | 1050              |
|                               | 4                                 | 981                       | 172              | 927              | 2280              | 1060              |
|                               | 6                                 | 1090                      | 226              | 1000             | 2410              | 1190              |
|                               | Slope                             | 26.4                      | 25.985           | 17.05            | -10               | 23                |
|                               | Intercept                         | 907.8                     | 69.57            | 887.1            | 2425              | 1016              |
|                               | R <sup>2</sup>                    | 0.8806                    | 0.9996           | 0.7865           | 0.0957            | 0.7101            |
|                               | LOQ                               | 0.33                      | 0.43             | 0.69             | 4.43              | 0.50              |
|                               | Amount ( $\mu\text{g/g}$ )        | 17.2                      | 1.34             | 26.0             | -121.3            | 22.1              |
| <b>5</b>                      | 0                                 | 114                       | 37.1             | 69.2             | 401               | 92.9              |
|                               | 2                                 | 174                       | 95.7             | 124              | 429               | 154               |
|                               | 4                                 | 235                       | 164              | 188              | 499               | 217               |

| Product Number or Calibration | Standard Conc. (ppm) or Parameter | 1,4- Dioxane Product Ions        |                    |                    |                                |                                |
|-------------------------------|-----------------------------------|----------------------------------|--------------------|--------------------|--------------------------------|--------------------------------|
|                               |                                   | H <sub>3</sub> O <sup>+</sup> 89 | NO <sup>+</sup> 87 | NO <sup>+</sup> 88 | O <sub>2</sub> <sup>+</sup> 58 | O <sub>2</sub> <sup>+</sup> 88 |
|                               | 6                                 | 312                              | 224                | 253                | 557                            | 278                            |
|                               | Slope                             | 32.75                            | 31.45              | 30.77              | 26.9                           | 30.915                         |
|                               | Intercept                         | 110.5                            | 35.85              | 66.24              | 390.8                          | 92.73                          |
|                               | R <sup>2</sup>                    | 0.9961                           | 0.9992             | 0.9985             | 0.9750                         | 1.0000                         |
|                               | LOQ                               | 0.27                             | 0.36               | 0.38               | 1.65                           | 0.37                           |
|                               | Amount (µg/g)                     | 1.69                             | 0.570              | 1.08               | 7.26                           | 1.50                           |
| 6                             | 0                                 | 145                              | 35.3               | 58.5               | 248                            | 81.3                           |
|                               | 2                                 | 210                              | 105                | 124                | 301                            | 150                            |
|                               | 4                                 | 258                              | 155                | 172                | 336                            | 202                            |
|                               | 6                                 | 303                              | 215                | 232                | 383                            | 252                            |
|                               | Slope                             | 26.1                             | 29.455             | 28.425             | 22                             | 28.205                         |
|                               | Intercept                         | 150.7                            | 39.21              | 61.35              | 251                            | 86.71                          |
|                               | R <sup>2</sup>                    | 0.9920                           | 0.9961             | 0.9968             | 0.9945                         | 0.9939                         |
|                               | LOQ                               | 0.34                             | 0.38               | 0.41               | 2.01                           | 0.41                           |
|                               | Amount (µg/g)                     | 2.89                             | 0.666              | 1.08               | 5.70                           | 1.54                           |
| 7                             | 0                                 | 309                              | 26.4               | 82.5               | 325                            | 105                            |
|                               | 2                                 | 359                              | 85.5               | 138                | 379                            | 164                            |
|                               | 4                                 | 413                              | 143                | 196                | 419                            | 226                            |
|                               | 6                                 | 485                              | 213                | 273                | 484                            | 297                            |
|                               | Slope                             | 29.1                             | 30.865             | 31.475             | 25.85                          | 31.9                           |
|                               | Intercept                         | 304.2                            | 24.38              | 77.95              | 324.2                          | 102.3                          |
|                               | R <sup>2</sup>                    | 0.9923                           | 0.9979             | 0.9935             | 0.9921                         | 0.9981                         |
|                               | LOQ                               | 0.30                             | 0.36               | 0.37               | 1.71                           | 0.36                           |
|                               | Amount (µg/g)                     | 5.23                             | 0.395              | 1.24               | 6.27                           | 1.60                           |
| 8                             | 0                                 | 3010                             | 60                 | 132                | 1450                           | 864                            |
|                               | 2                                 | 3080                             | 149                | 232                | 1400                           | 955                            |
|                               | 4                                 | 3190                             | 233                | 311                | 1490                           | 1080                           |
|                               | 6                                 | 3280                             | 353                | 440                | 1670                           | 1180                           |
|                               | Slope                             | 46                               | 48.15              | 50.15              | 37.5                           | 53.65                          |
|                               | Intercept                         | 3002                             | 54.3               | 128.3              | 1390                           | 858.8                          |
|                               | R <sup>2</sup>                    | 0.9934                           | 0.9931             | 0.9909             | 0.6781                         | 0.9966                         |
|                               | LOQ                               | 0.19                             | 0.23               | 0.23               | 1.18                           | 0.21                           |
|                               | Amount (µg/g)                     | 32.6                             | 0.564              | 1.28               | 18.5                           | 8.00                           |
| 9                             | 0                                 | 50.5                             | 83.7               | 69.8               | 356                            | 402                            |
|                               | 2                                 | 109                              | 138                | 128                | 403                            | 447                            |
|                               | 4                                 | 176                              | 194                | 187                | 437                            | 511                            |
|                               | 6                                 | 230                              | 261                | 245                | 498                            | 573                            |
|                               | Slope                             | 30.275                           | 29.395             | 29.23              | 23                             | 28.85                          |
|                               | Intercept                         | 50.55                            | 80.99              | 69.76              | 354.5                          | 396.7                          |
|                               | R <sup>2</sup>                    | 0.9985                           | 0.9974             | 1.0000             | 0.9880                         | 0.9944                         |
|                               | LOQ                               | 0.29                             | 0.38               | 0.40               | 1.93                           | 0.40                           |
|                               | Amount (µg/g)                     | 0.835                            | 1.38               | 1.19               | 7.71                           | 6.88                           |
| Aqueous Cal.                  | 0                                 | 3.75                             | 4.73               | 7.06               | 30.3                           | 4.94                           |

| Product<br>Number or<br>Calibration | Standard<br>Conc. (ppm) or<br>Parameter | 1,4- Dioxane Product Ions        |                    |                    |                                |                                |
|-------------------------------------|-----------------------------------------|----------------------------------|--------------------|--------------------|--------------------------------|--------------------------------|
|                                     |                                         | H <sub>3</sub> O <sup>+</sup> 89 | NO <sup>+</sup> 87 | NO <sup>+</sup> 88 | O <sub>2</sub> <sup>+</sup> 58 | O <sub>2</sub> <sup>+</sup> 88 |
|                                     | 2                                       | 61.7                             | 63.1               | 60.7               | 75                             | 69.7                           |
|                                     | 4                                       | 116                              | 122                | 121                | 125                            | 126                            |
|                                     | 6                                       | 182                              | 184                | 190                | 180                            | 192                            |
|                                     | 8                                       | 227                              | 238                | 229                | 221                            | 241                            |
|                                     | 10                                      | 281                              | 288                | 283                | 270                            | 287                            |
|                                     | Slope                                   | 27.83                            | 28.62              | 27.91              | 24.16                          | 28.43                          |
|                                     | Intercept                               | 6.09                             | 6.90               | 8.92               | 29.40                          | 11.28                          |
|                                     | R <sup>2</sup>                          | 0.9981                           | 0.9989             | 0.9956             | 0.9989                         | 0.9960                         |

**Table S3.** Formaldehyde concentrations ( $\mu\text{g g}^{-1}$ ) in nine haircare and skincare products using the method of standard additions with SIFT-MS. Values reported in the main article are calculated from the 'good' amounts shown in green. Values in gray are subject to significant interference for the product.

| Product Number or Calibration | Standard Conc. (ppm) or Parameter | Formaldehyde Product Ion $\text{H}_3\text{O}^+ 31$ |
|-------------------------------|-----------------------------------|----------------------------------------------------|
| <b>1</b>                      | 0                                 | 8.82                                               |
|                               | 10                                | 47.3                                               |
|                               | 20                                | 79.7                                               |
|                               | 30                                | 130                                                |
|                               | Slope                             | 3.959                                              |
|                               | Intercept                         | 7.064                                              |
|                               | $R^2$                             | 0.9919                                             |
|                               | LOQ                               | 3.30                                               |
|                               | Amount ( $\mu\text{g/g}$ )        | <LOQ                                               |
| <b>2</b>                      | 0                                 | 8.87                                               |
|                               | 10                                | 47.9                                               |
|                               | 20                                | 88.4                                               |
|                               | 30                                | 129                                                |
|                               | Slope                             | 4.009                                              |
|                               | Intercept                         | 8.409                                              |
|                               | $R^2$                             | 0.9999                                             |
|                               | LOQ                               | 3.26                                               |
|                               | Amount ( $\mu\text{g/g}$ )        | <LOQ                                               |
| <b>3</b>                      | 0                                 | 302                                                |
|                               | 10                                | 339                                                |
|                               | 20                                | 394                                                |
|                               | 30                                | 440                                                |
|                               | Slope                             | 4.69                                               |
|                               | Intercept                         | 298.4                                              |
|                               | $R^2$                             | 0.9949                                             |
|                               | LOQ                               | 2.78                                               |
|                               | Amount ( $\mu\text{g/g}$ )        | 31.8                                               |
| <b>4</b>                      | 0                                 | 549                                                |
|                               | 10                                | 581                                                |
|                               | 20                                | 600                                                |
|                               | 30                                | 632                                                |
|                               | Slope                             | 2.680                                              |
|                               | Intercept                         | 550.3                                              |
|                               | $R^2$                             | 0.9907                                             |
|                               | LOQ                               | 4.87                                               |
|                               | Amount ( $\mu\text{g/g}$ )        | 102.7                                              |
| <b>5</b>                      | 0                                 | 10.6                                               |
|                               | 10                                | 45.5                                               |
|                               | 20                                | 87.2                                               |



| Product Number or Calibration | Standard Conc. (ppm) or Parameter | Formaldehyde Product Ion $\text{H}_3\text{O}^+$ 31 |
|-------------------------------|-----------------------------------|----------------------------------------------------|
|                               | 30                                | 127                                                |
|                               | Slope                             | 3.909                                              |
|                               | Intercept                         | 8.940                                              |
|                               | R <sup>2</sup>                    | 0.9987                                             |
|                               | LOQ                               | 3.34                                               |
|                               | Amount (µg/g)                     | <LOQ                                               |
|                               | 6                                 | 0                                                  |
|                               | 10                                | 48.6                                               |
|                               | 20                                | 82.4                                               |
|                               | 30                                | 115                                                |
|                               | Slope                             | 3.562                                              |
|                               | Intercept                         | 9.958                                              |
|                               | R <sup>2</sup>                    | 0.9969                                             |
|                               | LOQ                               | 3.66                                               |
|                               | Amount (µg/g)                     | <LOQ                                               |
|                               | 7                                 | 0                                                  |
|                               | 10                                | 45.7                                               |
|                               | 20                                | 83.3                                               |
|                               | 30                                | 118                                                |
|                               | Slope                             | 3.698                                              |
|                               | Intercept                         | 8.106                                              |
|                               | R <sup>2</sup>                    | 0.9995                                             |
|                               | LOQ                               | 3.53                                               |
|                               | Amount (µg/g)                     | <LOQ                                               |
|                               | 8                                 | 0                                                  |
|                               | 10                                | 75.1                                               |
|                               | 20                                | (outlier)                                          |
|                               | 30                                | 179                                                |
|                               | Slope                             | 5.595                                              |
|                               | Intercept                         | 13.15                                              |
|                               | R <sup>2</sup>                    | 0.9962                                             |
|                               | LOQ                               | 2.33                                               |
|                               | Amount (µg/g)                     | <LOQ                                               |
|                               | 9                                 | 0                                                  |
|                               | 10                                | 47.6                                               |
|                               | 20                                | 85.6                                               |
|                               | 30                                | 122                                                |
|                               | Slope                             | 3.810                                              |
|                               | Intercept                         | 8.569                                              |
|                               | R <sup>2</sup>                    | 0.9996                                             |
|                               | LOQ                               | 3.43                                               |
|                               | Amount (µg/g)                     | <LOQ                                               |
| Aqueous Cal.                  | 0                                 | 7.41                                               |

| Product<br>Number or<br>Calibration | Standard<br>Conc. (ppm) or<br>Parameter | Formaldehyde<br>Product Ion<br>H <sub>3</sub> O <sup>+</sup> 31 |
|-------------------------------------|-----------------------------------------|-----------------------------------------------------------------|
|                                     | 10                                      | 45.3                                                            |
|                                     | 20                                      | 78.9                                                            |
|                                     | 30                                      | 122                                                             |
|                                     | 40                                      | 152                                                             |
|                                     | 50                                      | 180                                                             |
|                                     | Slope                                   | 3.503                                                           |
|                                     | Intercept                               | 10.02                                                           |
|                                     | R <sup>2</sup>                          | 0.9960                                                          |
